# Supplementary material for: Identification of Gentiana rigescens from different geographical origins based on HPLC and FTIR fingerprints
Source: Royal Society of Chemistry journal article supplement (doi:10.1039/d0ay00309c), 2020-01-01
Supplement: d0ay00309c1.pdf [file d0ay00309c1.pdf]

Supplementary table 1 The contribution results of different number of PC

| Component | Chromatogram |             | Spectra     |             |
|-----------|--------------|-------------|-------------|-------------|
|           | Cumulative%  | Eigenvalues | Cumulative% | Eigenvalues |
| 1         | 0.419        | 107         | 0.36        | 147         |
| 2         | 0.608        | 22.8        | 0.504       | 58.5        |
| 3         | 0.7159       | 19.8        | 0.6473      | 58.3        |
| 4         | 0.7921       | 12.8        | 0.7523      | 16.3        |
| 5         | 0.8565       | 10.4        | 0.825       | 13.3        |
| 6         | 0.9029       | 8.96        | 0.8893      | 10.97       |
| 7         | 0.9256       | 7.81        | 0.9255      | 9.12        |
| 8         | 0.9452       | 7.01        | 0.9356      | 8.41        |
